# Supplementary material for: Genome-wide DNA methylation patterns of bovine blastocysts derived from in vivo embryos subjected to in vitro culture before, during or after embryonic genome activation
Source: PubMed Central journal article supplement (PMC5984773; doi:10.1186/s12864-018-4826-3), 2018-06-01

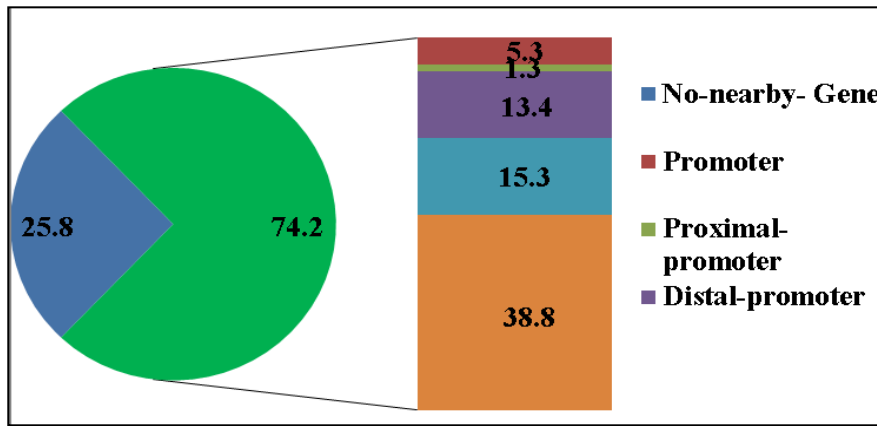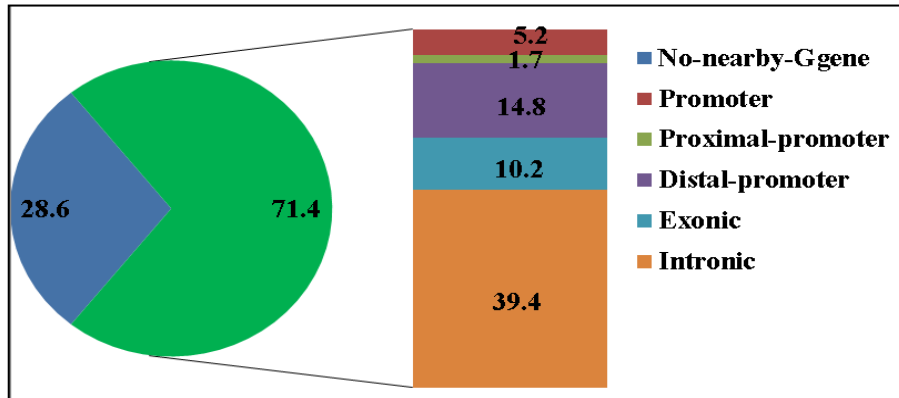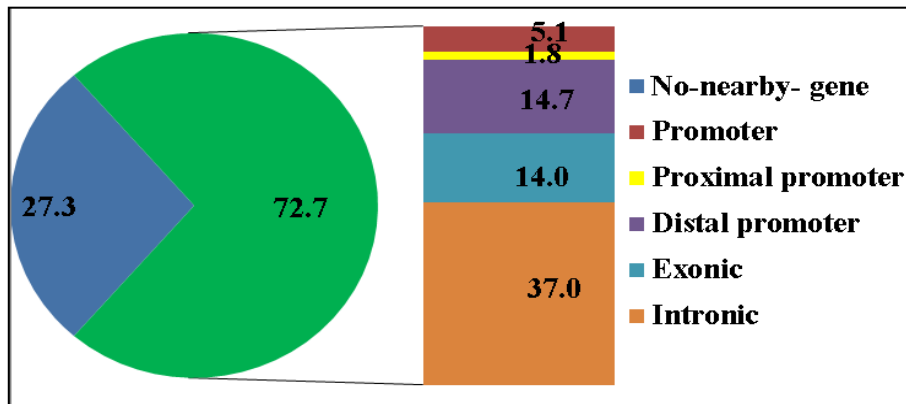

Supplement: 12864_2018_4826_MOESM5_ESM.pdf [file 12864_2018_4826_MOESM5_ESM.pdf]
